# Supplementary material
Source: ML conference proceedings conference paper supplement (https://openaccess.thecvf.com/content/ICCV_2019/html/Chen_Large-Scale_Tag-Based_Font_ICCV_2019_paper.html)
Supplement: Supplementary file 1 [file Chen_Large-Scale_Tag-Based_Font_ICCV_2019_supplemental.pdf]

# Supplementary Material for Large-scale Tag-based Font Retrieval with Generative Feature Learning

Tianlang Chen<sup>1</sup>, Zhaowen Wang<sup>2</sup>, Ning Xu<sup>2</sup>, Hailin Jin<sup>2</sup> and Jiebo Luo<sup>1</sup>

<sup>1</sup>University of Rochester <sup>2</sup>Adobe Research

{tchen45, jluo}@cs.rochester.edu, {zhawang, nxu, hljin}@adobe.com

In this document, we provide additional materials to supplement our paper “Large-scale Tag-based Font Retrieval with Generative Feature Learning”. In the first section, we provide more details about our collected font retrieval dataset. In the second section, we describe the evaluation measurement of MyFonts-test set. In the third section, we provide the weight initialization details of the attention module and the retrieval model. In the fourth section, we comprehensively illustrate the retrieval performance of the proposed model on typical single-tag and multi-tag queries.

## 1. Dataset Supplementary Information

In Section 3 of our paper, we present a large-scale tag-based font retrieval dataset, which is collected from MyFonts. After tag preprocessing, the dataset finally contains 1824 tags for font description. Table 1 provides us deeper insight into these tags by showing the top-200 frequent tags. It can be seen that the dataset contains meaningful tags that cover different aspects of a font, such as its category (e.g. “sans-serif”, “script”, “handwrite”), appearance (e.g. “heavy”, “outline”, “round”), utility (e.g. “poster”, “magazine”, “logo”) and other special features (e.g. “kid”, “romantic”, “cartoon”).

On the other hand, we collect a tagging set with ranking information via Amazon Mechanical Turk (AMT) as a complement for evaluation. The detailed process of collecting the tagging set is described in the main submission. Roughly speaking, this set contains 1661 groups. Each group includes three fonts related to a specific tag, and is finally labeled a most matching one agreed by all the workers. We show a large number of group examples in Figure 1 to present the tagging set in detail.

## 2. Measurement of MyFonts-test Set

We evaluate different models’ performance on the MyFonts-test set by two standard measures, mean average precision (mAP) and Normalized Discounted cumulative gain (nDCG). For average precision (AP), given a query  $q$ , assuming that the total  $H$  positive fonts  $\{f_1, f_2, \dots, f_H\}$  in

the test set have affinity score ranks  $\{r_1, r_2, \dots, r_H\}$ , the average precision score of  $q$  ( $AP_q$ ) is computed as:  $AP_q = \frac{1}{H} \sum_{h=1}^H \frac{h}{r_h}$ . For nDCG, given the font relevance  $\{rel_1, rel_2, \dots, rel_S\}$  for the total  $S$  test fonts, which have affinity score ranks  $\{1, 2, \dots, S\}$  on query  $q$ ,  $nDCG_q$  is computed as:  $DCG_q = \sum_{p=1}^S \frac{2^{rel_p} - 1}{\log_2(p+1)}$ ,  $nDCG_q = \frac{DCG_q}{IDCG_q}$ , where  $IDCG_q$  is the maximum possible value of  $DCG_q$  for different ranking results on  $q$ . The font relevance for a positive font is set to 1, for a negative font, it is set to 0.

In our experiments, given a set of test queries, we compute the mean value of AP (mAP) and nDCG for all queries as the final mAP and nDCG scores.

## 3. Weight Initialization

In the training process, we find that the weight initialization of the attention module and the retrieval model can make effect on the final performance. For the attention module that contains a fully-connected layer followed by a sigmoid unit, the weights of the fully-connected layer are initialized using a normal distribution  $(\mu, \sigma)$  where  $\mu = 0$  and  $\sigma = 5$ . The retrieval model contains two fully-connected layers whose dimensions are set as  $N$  and 1.  $N$  is the total tag vocabulary size. The first layer with a ReLU unit maps the  $N$ -dimensional query-based tag probability vector to a  $N$ -dimensional feature vector. The second layer with a sigmoid unit then maps it to the final affinity score. We use a  $N \times N$  identity matrix to initialize the weights of the first layer, and use a normal distribution with  $\mu = 1$  and  $\sigma = 0.02$  to initialize the weights of the second layer.

## 4. Additional qualitative results

In this section, we illustrate a great number of font retrieval results of the proposed model as the supplement of Figure 6 in the main submission. We test the model’s performance on typical single-tag and multi-tag queries, the top-20 retrieved fonts for each query are shown as Figure 2. These results demonstrate the effectiveness of our model to retrieve the top corresponding fonts for a wide range of tags.

Table 1. Top-200 frequent tags for the collected dataset.

|               |             |              |             |              |               |              |              |                 |             |
|---------------|-------------|--------------|-------------|--------------|---------------|--------------|--------------|-----------------|-------------|
| decorative    | display     | headline     | poster      | sans-serif   | magazine      | modern       | legible      | retro           | script      |
| elegant       | informal    | serif        | handwrite   | logo         | geometric     | funny        | vintage      | contemporary    | clean       |
| bold          | sans        | alternate    | package     | sketch       | brand         | heavy        | text         | round           | invitation  |
| ligature      | letter      | advertise    | fun         | friendly     | calligraphy   | hand         | rough        | wed             | swash       |
| ornament      | casual      | cool         | brush       | handmade     | fashion       | calligraphic | commercial   | narrow          | cursive     |
| book          | signage     | comic        | grunge      | fancy        | art-deco      | hand-drawn   | editorial    | corporate       | fashionable |
| cute          | condense    | kid          | organic     | multilingual | feminine      | monoline     | slab-serif   | connect         | antique     |
| cyrillic      | pen         | logotype     | title       | all-caps     | german        | news         | ink          | square          | symbol      |
| playful       | formal      | grotesk      | soft        | futuristic   | child         | humanist     | thin         | stylish         | classic     |
| scrapbook     | technical   | light        | black       | wide         | simple        | techno       | ancient      | food            | unique      |
| stencil       | american    | design       | grotesque   | dingbat      | opentype      | 1930s        | unusual      | block           | picture     |
| cartoon       | italic      | small-caps   | 1800s       | outline      | computer      | music        | illustration | capital-sharp-s | web         |
| versal-eszett | 1950s       | masculine    | valentine   | party        | lively        | sanserif     | creative     | irregular       | romantic    |
| curly         | wood-type   | blackletter  | 1960s       | happy        | 1920s         | label        | greet        | newspaper       | gothic      |
| print         | distress    | sharp        | ornamental  | fresh        | sport         | workhorse    | delicate     | capital         | 1940s       |
| screen        | cap         | natural      | brush-drawn | love         | sign-painting | inline       | hipster      | engrave         | menu        |
| fat           | art-nouveau | experimental | oldstyle    | industrial   | neutral       | 1970s        | bouncy       | crazy           | wild        |
| sign          | caps-only   | flourish     | versatile   | minimal      | movie         | french       | linear       | urban           | roman       |
| slab          | film        | publish      | angular     | modular      | beautiful     | art          | expressive   | texture         | deco        |
| graceful      | mechanical  | letterpress  | paint       | western      | wild-west     | dynamic      | game         | greek           | draw        |

### happy

The quick brown fox  
The quick brown fox  
THE QUICK BROWN FOX

### friendly

The quick brown fox  
The quick brown fox  
The quick brown fox

### heavy

The quick brown fox  
The quick brown fox  
The quick brown fox

### brush

THE QUICK BROWN FOX  
The quick brown fox  
THE QUICK BROWN FOX

### invitation

The quick brown fox  
The quick brown fox  
The quick brown fox

### narrow

The quick brown fox  
THE QUICK BROWN FOX  
The quick brown fox

### swash

The quick brown fox  
The quick brown fox  
The quick brown fox

### magazine

The quick brown fox  
The quick brown fox  
The quick brown fox

### feminine

The quick brown fox  
The quick brown fox  
The quick brown fox

### halloween

The quick brown fox  
THE QUICK BROWN FOX  
The quick brown fox

### 3d

THE QUICK BROWN FOX  
The quick brown fox  
THE QUICK BROWN FOX

### hand-drawn

The quick brown fox  
THE QUICK BROWN FOX  
THE QUICK BROWN FOX

### western

THE QUICK BROWN FOX  
THE QUICK BROWN FOX  
The quick brown fox

### blackletter

The quick brown fox  
The quick brown fox  
THE QUICK BROWN FOX

Figure 1. Group examples of the collected tagging set. For each group of a tag, the ground-truth font is in the red box.

decorative

YZZjQ  
BTRUP  
BHYVO  
vqckKh  
RSEDP  
ASGDH  
tyGXj  
FWLNH  
YLCU  
wSCX  
VLPDJ  
uc.HGo  
OGFVH  
SLDOE  
eOHL  
OWBW  
ETLU  
cxSnd

alternate

QRYKL  
xmif A  
OZM  
hpJIm  
BqCRP  
dLMPU  
HXZLB  
UYENr  
nrDmk  
dLCFq  
dweBz  
OuwTb  
N.GC  
HGCKU  
gebST  
wSCX  
tvRua  
N.GC  
BZgtW

text

dgjWw  
ixgvC  
pFHxQ  
FRCpb  
FHBzR  
ZWRgj  
MpDuE  
PmSqF  
Gqlsm  
EkgQG  
tWDyZ  
IBryO  
jNvZa  
iaZje  
kqjCM  
JOiLC  
sjMbg  
Uagmi  
YWumF  
wYDXd

moden

MrXxE  
YWumF  
JZwAX  
QpZVv  
Pfkji  
RkDHC  
CSZWH  
ZoOrD  
TNFCh  
VTJNp  
mNIDA  
XOSLh  
PqbOx  
MTWGU  
RXSLZ  
hGDNI  
AkteT  
NOWRI  
pimre  
WmpXZ

legible

EkgQG  
YWumF  
jNvZa  
LZISK  
xjGEO  
FHBzR  
pFHxQ  
wYDXd  
yZeWX  
PmSqF  
ixgvC  
ZWRgj  
iaZje  
OFnHy  
nrivP  
JsBvS  
YOkPy  
tWDyZ  
UCMIV  
ZoOrD

display

WBA  
RTJUR  
HVDJT  
LAWOX  
HAL  
RTHPK  
MOWXD  
YXEV  
VJNSX  
JROZE  
ROUF  
UYCL  
AELTN  
HNLYJ  
PMLCA  
BLMQH  
HADMV  
OSL3X  
NOWRI  
YGCu

elegant

hGDNI  
LqJye  
YOURD  
izHCU  
lgOnp  
lofnQ  
uc.HGo  
xhwWM  
TealW  
neWkZ  
BZgtW  
SdHak  
N.GC  
WbamG  
ImCRn  
iPhOL  
OdYLx  
jSRyk

contemporary

YGCu  
Pfkji  
MrXxE  
ZIAZF  
EfwkL  
UeRkz  
TNFCh  
wmigl  
JZwAX  
VTJNp  
boryQ  
CAFLN  
PqbOx  
PBuOV  
tpaHn  
yKdGh  
zWcNA  
nrivP  
Bipvw  
jsrYk

headline

NOWRI  
RTJUR  
WBA  
HAL  
HRTXC  
BLMQH  
IBBCY  
JROZE  
YXEV  
VIBZH  
UUFIN  
HVDJT  
MOWXD  
HNLYJ  
VJNSX  
Dzmib  
ROUF  
YGIWD  
LAWOX  
QRYKL

letter

QRYKL  
BqCRP  
nKRHQ  
wSCX  
OZM  
KodpT  
HGCKU  
YGCu  
QRYKL  
BZgtW  
WbamG  
bmoHf  
nrDmk  
hpJIm  
UYENr  
Dzmib  
rDba  
EZW  
EfwkL

comic

JIEXP  
ADGLS  
DKIGH  
CSYAE  
ZECar  
Zagjo  
mtjAl  
OUKTB  
AQJVG  
MHUJS  
MzTxS  
DUPET  
VIBXU  
ahTmR  
JNEPJ  
IOpG  
JNYH  
JFOTg  
SCHND

funny

OGFVH  
hkiEG  
JNEPJ  
YGCu  
snStk  
FOOYE  
IMFrK  
JCQWK  
dBPLY  
nDCou  
fzIDI  
TxSwO  
NIQSV  
prXYC  
UHKFU  
MHUJS  
XNACZ  
Knpmr

calligraphy

wSCX  
uc.HGo  
xlrD3  
BZgtW  
zEq3v  
xmif A  
madD  
sImT  
lojwm  
N.GC  
iPhOL  
kOMq  
WbamG  
DmD  
SHAhJ  
LODX  
VTEG  
dLcBas

rough

NOWRI  
TFCUE  
UUFIN  
ecEvH  
TUDIQ  
YPXC  
BKOEo  
CJUWI  
HEBSO  
6VBzP  
KodpT  
EJQFe  
uKOBU  
BqCRP  
TFUEP  
WBRsS  
JCQWK  
VESPR  
SMBKJ

wed

thped  
VTJNp  
Pfkji  
CAFLN  
Wmigl  
H6104  
dUYbi  
tWDyZ  
AkteT  
sCmyf  
WmpXZ  
PqbOx  
jsrYk  
UeRkz  
VMQc  
CSZWH  
ViRuX  
RXSLZ  
TNFCh  
JsBvS

swash

QRYKL  
TpXde  
N.GC  
uChLg  
N.GC  
OZM  
ArkVt  
gifH  
N.AyLi  
STgEh  
rGcy  
NJCqu  
D.TsR  
EXzLQ  
jSRyk

brush

QRYKL  
HXZLB  
UYENr  
xmif A  
OZM  
gebST  
hpJIm  
SIRIA  
dvSro  
BzPMD  
dLMPU  
bmoHf  
OuwTb  
IKsMO  
BqCRP  
wJxlla  
BKOEo  
nrDmk  
6VBzP  
POGMB

fashion

BqCRP  
dLCFq  
YPRJD  
HXZLB  
EfwkL  
ETLU  
vuyJh  
Aixid  
VLPDJ  
NJCqu  
dvSro  
rNIST  
IBOIM  
OuwTb  
KDCGp  
hGDNI  
sImT  
neWkZ  
RkDHC  
MOWXKH

signage

ngzyB  
xmif A  
uc.HGo  
TMUPX  
OjNzX  
qHIB  
ZSHSH  
ZIAZF  
CWVSA  
RagtG  
wEIT  
ODraN  
JcpXW  
JoAze  
KtGEC  
xUIDW  
CeHhg  
tpaHn  
TKarZ  
iKvhl

cursive

QRYKL  
xmif A  
WbamG  
N.GC  
rDba  
mxu3g  
rGcy  
J.EqH  
WbamG  
BZgtW  
KodpT  
dLMPU  
dweBz  
EQU  
DmHm



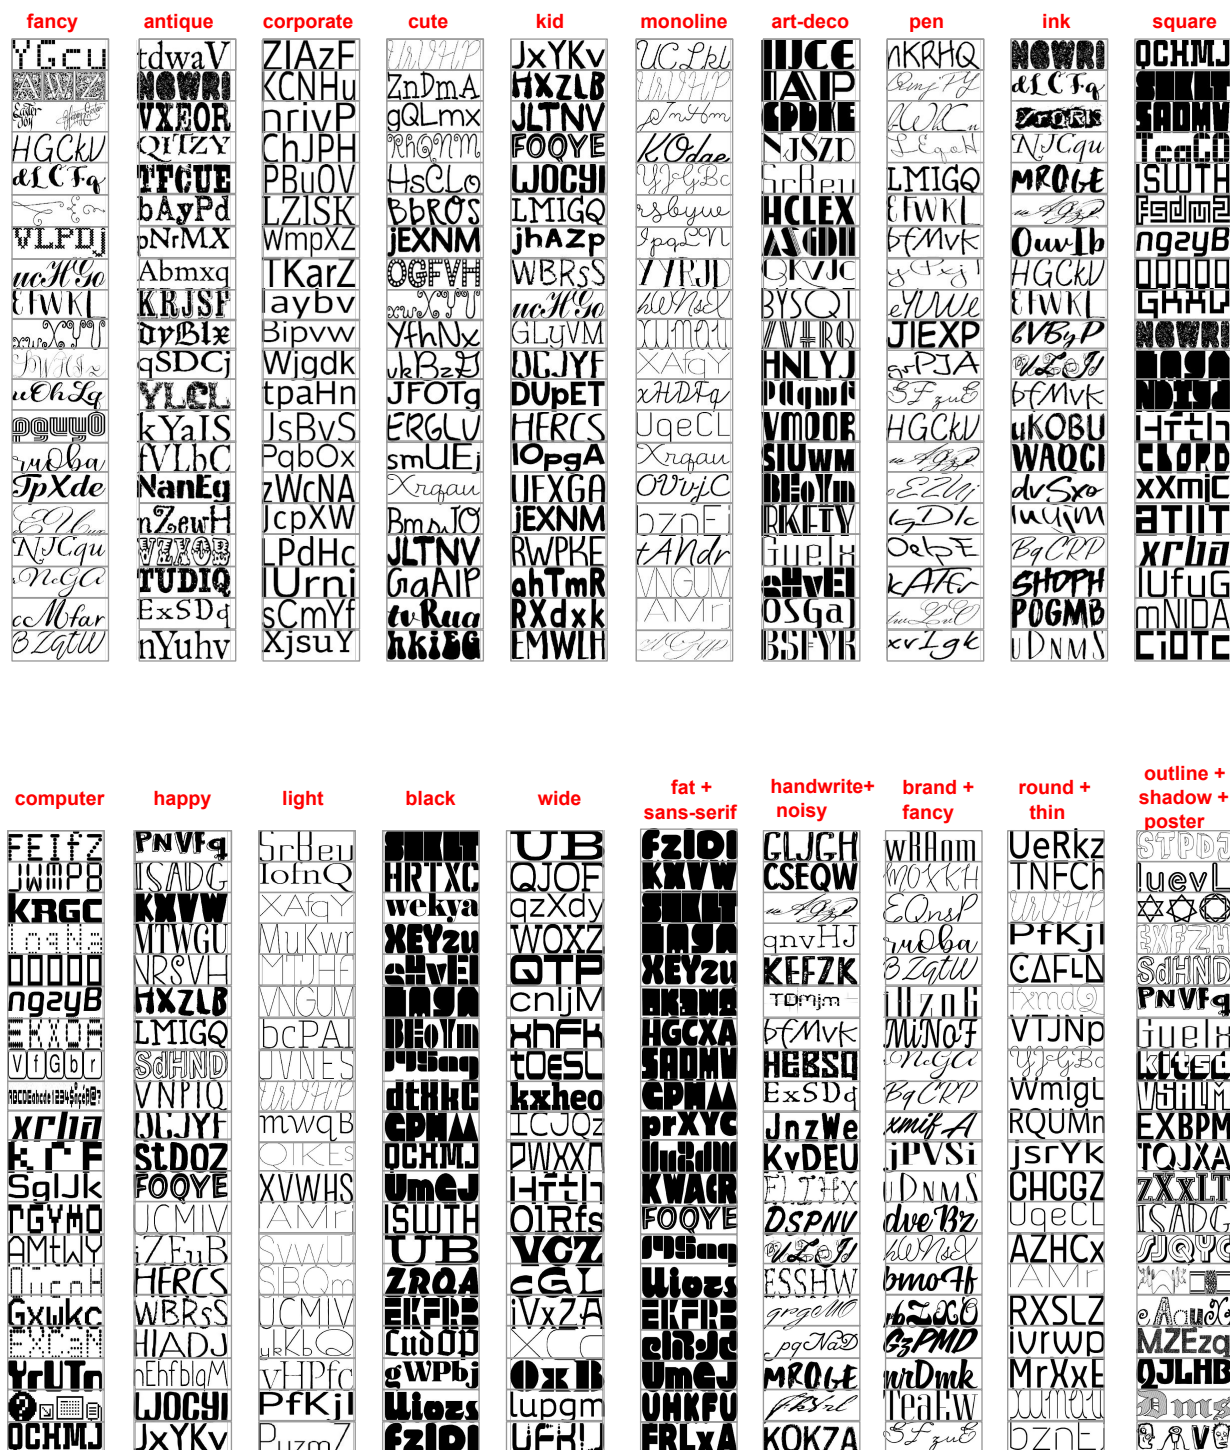

Figure 2. Font retrieval results of the proposed model on typical single-tag and multi-tag queries.
